# Supplementary material
Source: PubMed Central journal article supplement (PMC4545488)
Supplement: NIHMS706935-supplement-pdf.pdf [file NIHMS706935-supplement-pdf.pdf]

Supporting Information: Reversible Aptamer-Au Plasmon Rulers  
for Secreted Single Molecules

<sup>1,5-6</sup>Somin Eunice Lee\*\*, <sup>2-3</sup>Qian Chen\*, <sup>1,7</sup>Ramray Bhat\*,  
<sup>2-3</sup>Shayne Petkiewicz, <sup>2-3</sup>Jessica M. Smith, <sup>2-3</sup>Vivian E. Ferry, <sup>1</sup>Ana Luisa Correia,  
<sup>2-4</sup>A. Paul Alivisatos\*\*, and <sup>1</sup>Mina J. Bissell\*\*

<sup>1</sup>*Life Sciences Division, <sup>2</sup>Material Science Division, Lawrence Berkeley National  
Laboratory, Berkeley, CA 94720, United States*

<sup>3</sup>*Department of Chemistry and Materials Science & Engineering, <sup>4</sup>Kavli Energy  
NanoScience Institute, Berkeley, CA 94720, United States*

<sup>5</sup>*Department of Electrical & Computer Engineering, <sup>6</sup>Biointerfaces Institute,  
University of Michigan, Ann Arbor, MI 48109 United States*

<sup>7</sup>*Department of Molecular Reproduction Development and Genetics, Indian Institute of  
Science, Bangalore, 560012, India*

\* Both authors contributed equally.

\*\* To whom correspondence should be addressed.

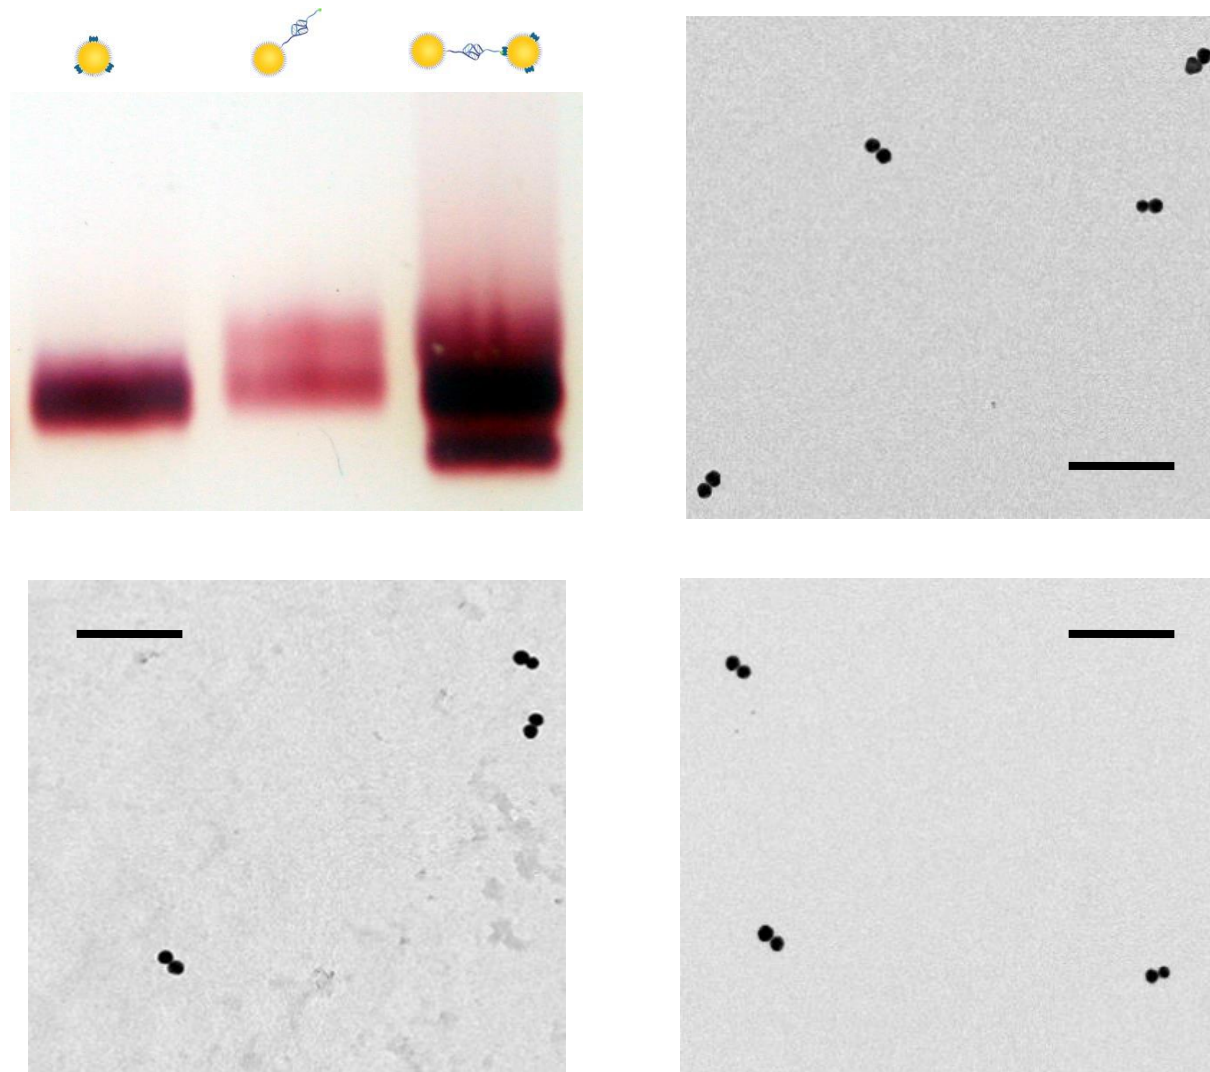

Fig. S1

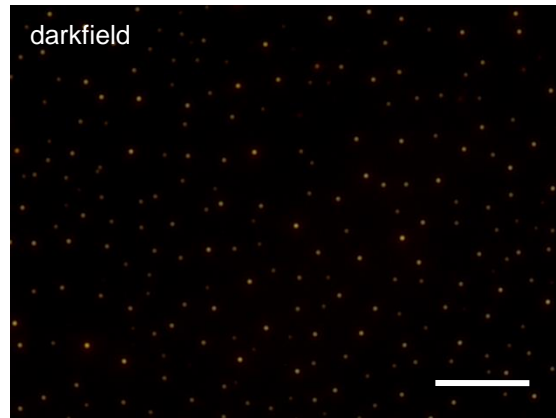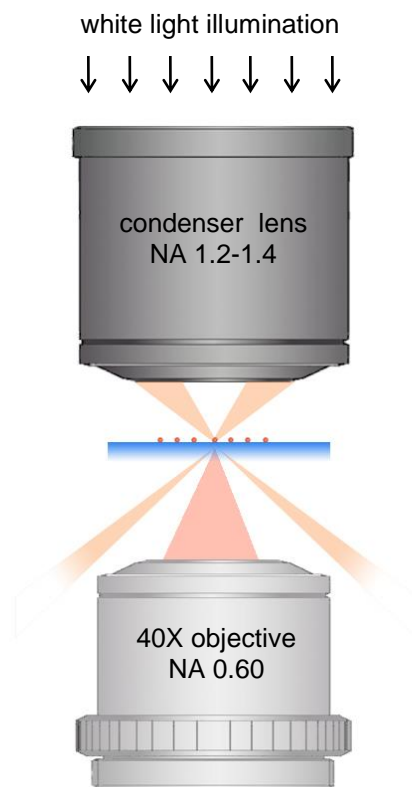

Fig. S2

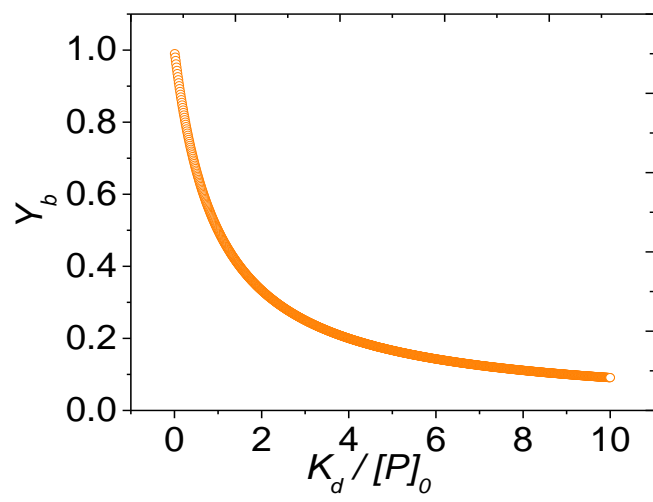

Fig. S3

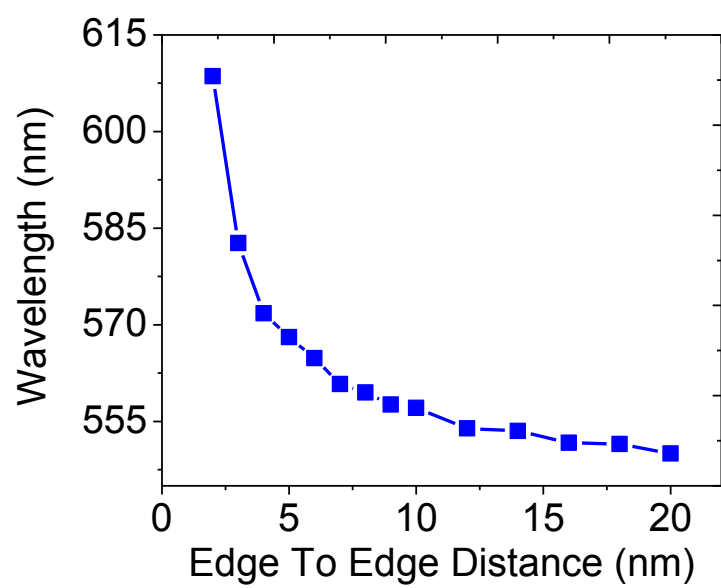

Fig. S4

**Figure S1. Assembly of reversible plasmon rulers.** Electrophoretic analysis of plasmon ruler assembly. The first lane corresponds to Au nanoparticles (30 nm diameter) functionalized with avidin. The second lane corresponds to HPLC separated monomeric aptamer-Au nanoparticles (30 nm diameter). Monomeric aptamer-Au nanoparticles are then stoichiometrically added to avidin-coated Au nanoparticles (1:1). The bottom band of the third lane corresponds to purified aptamer-Au plasmon rulers. A 40% yield of aptamer-Au plasmon rulers is estimated based on the intensity analysis of the gel (Image J). Representative transmission electron microscopy images of aptamer-Au plasmon rulers. Scale bar of the population image is 200 nm.

**Figure S2. Single-particle imaging of plasmon rulers.** Plasmon rulers were immobilized with one particle bound to the glass surface. Transmission-mode darkfield microscopy was used to visualize single plasmon rulers. Scale bar of the population image is 20  $\mu\text{m}$ .

**Figure S2. Percentage of protein molecules detected by plasmon rulers versus protein concentration.**  $Y_b$  is the yield of the binding reaction, i.e., percentage of protein molecules that can conjugated with plasmon rulers at an initial concentration of  $[P]_o$ . In our experiment, the initial protein concentration is much higher than the initial plasmon ruler concentration. As a result, we have  $Y_b = \frac{1}{\frac{K_d}{[P]_o} + 1}$ , as shown in the above plot. The percentage of detected protein molecules increases as the initial protein concentration increases.

**Figure S4. Calculation of peak position of plasmon rulers.** Electromagnetic simulation of peak position of coupled 30 nm Au nanoparticles. The distances are reported as edge-to-edge distances between the nanoparticles. As the distance between nanoparticles is decreased, the spectrum red-shifts. Simulations were performed in a homogeneous refractive index environment corresponding to water ( $n = 1.333$ ) and consider only the shift in the longitudinal mode.

## Supplementary Discussions

### Detection limit of plasmon rulers

The reversible plasmon rulers work through the following ligand binding reaction:

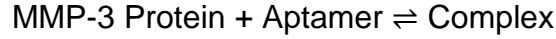

The dissociation constant  $K_d$  of the formed complex is defined as below:

$$\frac{[P][A]}{[C]} = K_d$$

Where  $[P], [A], [C]$  are the concentrations of protein, aptamer, and complex in equilibrium. For the detection of MMP-3 protein molecules,  $[A]_o$  and  $[P]_o$  are the initial concentrations of aptamer (plasmon rulers) and MMP3 proteins, while the initial concentration of complex is zero. If we assume a concentration of  $x$  proteins binded with aptamers after the reaction reaches equilibrium, we have:

$$\frac{[P][A]}{[C]} = K_d = \frac{([P]_o - x)([A]_o - x)}{x} = ([P]_o - x) \left( \frac{[A]_o}{x} - 1 \right)$$

So the percentage of protein molecules detected is:

$$Y_b = \frac{x}{[A]_o} = \frac{1}{\frac{K_d}{[P]_o - x} + 1}$$

In our experiments:  $[P]_o \gg [A]_o > x$ , so  $Y_b = \frac{1}{\frac{K_d}{[P]_o} + 1}$ , independent of  $[A]_o$ ;

The physical meaning of this relation is: our plasmon rulers could detect a portion of

$\frac{1}{\frac{K_d}{[P]_o} + 1}$  MMP-3 protein molecules at an initial protein concentration of  $[P]_o$ . When

$Y_b = 1/2$ , the required initial protein concentration  $[P]_o = K_d$ . In other words, half of the

MMP-3 molecules can be detected using the plasmon rulers when the initial protein



concentration equals to the dissociation constant, which defines the detection limit of the plasmon rulers.

### **Reversibility of plasmon rulers**

For the reversibility test of plasmon rulers in Figure 3, plasmon rulers were first reacted with 9 nM MMP3 protein molecules, and then exposed to 0 nM MMP3 protein molecules. A new set of equilibrium concentrations of free protein molecules, aptamers, and complex was established. If we assume  $y$  of complex is dissociated after the exposure to 0 nM MMP3 protein molecules, we have:

$$\frac{([P]_o + y)([A]_o + y)}{[C]_o - y} = K_d$$

Where  $[P]_o$ ,  $[A]_o$ ,  $[C]_o$  are the initial concentrations of protein, aptamer, and complex.

$$\frac{([P]_o + y)([A]_o + y)}{[C]_o - y} = K_d = \frac{y([A]_o + y)}{[C]_o - y} = \frac{[A]_o + y}{\frac{[C]_o}{y} - 1}$$

So the yield of the dissociation reaction

$$Y_d = \frac{y}{[C]_o} = \frac{1}{\frac{[A]_o + y}{K_d} + 1}$$

In our experimental condition,  $y \ll [C]_o \ll K_d$  and  $[A]_o \ll K_d$ , the dissociation percentage is 100%, which means ~100% of the complex will be dissociated from the plasmon rulers, and the plasmon rulers could be retrieved for the next round of detection.

### **Kinetics of the binding reaction**

By definition:

$$K_d = \frac{k_{off}}{k_{on}}$$

Where  $k_{off}$  is the reaction constant for the dissociation reaction,  $k_{on}$  is the reaction constant for the binding reaction.

From Figure 3, the unbinding event completes on a timescale of less than one minute, which means  $k_{on} > 0.1 \text{ s}^{-1}$ . In this reaction,  $K_d = 12.5 \text{ nM}$ , so  $k_{off} < 8 \times 10^5 \text{ s}^{-1} \text{ M}^{-1}$ .

#### **Estimation of the protein concentration in Figure 4**

From Figure 4, we can estimate around  $\frac{3}{4} = 0.75$  of the central peak positions have been shifted after the secretion of MMP3 in living cells. Then from the relation described in Figure S2, we have

$$Y_b = \frac{1}{\frac{K_d}{[P]_o} + 1} = 0.75$$

So  $[P]_o = 37.5 \text{ nM}$
